# Supplementary material for: Oxygen vacancies as active sites for H2S dissociation on the rutile TiO2(110) surface: a first-principles study
Source: Royal Society of Chemistry journal article supplement (doi:10.1039/c5cp06835e), 2016-01-01
Supplement: c5cp06835e1.pdf [file c5cp06835e1.pdf]

## Supporting Information

### **Oxygen Vacancy as Active Site for H<sub>2</sub>S Dissociation on Rutile TiO<sub>2</sub> (110) Surface: A First-principles Study**

Fang Wang,<sup>a,b</sup> Shiqian Wei,<sup>b</sup> Zhi Zhang,<sup>a</sup> Great R. Patzke<sup>c</sup> and Ying Zhou<sup>a,b\*</sup>

<sup>a)</sup> State Key Laboratory of Oil and Gas Reservoir and Exploitation, Southwest Petroleum University, Chengdu 610500, China

<sup>b)</sup> The Center of New Energy Materials and Technology, School of Materials Science and Engineering, Southwest Petroleum University, Chengdu 610500, China

<sup>c)</sup> Department of Chemistry, University of Zurich, Zurich 8057, Switzerland

\*To whom correspondence should be addressed

Email: yzhou@swpu.edu.cn (Y. Zhou)

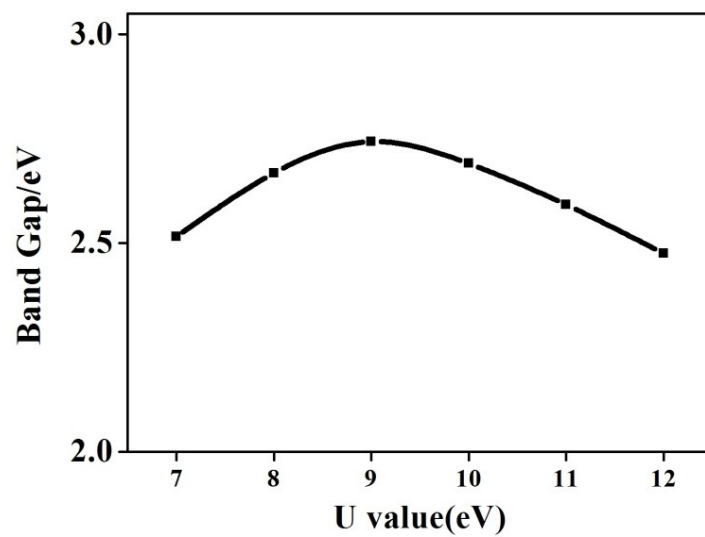

**Fig. S1** Variation of band gaps with different U parameters for rutile TiO<sub>2</sub>.

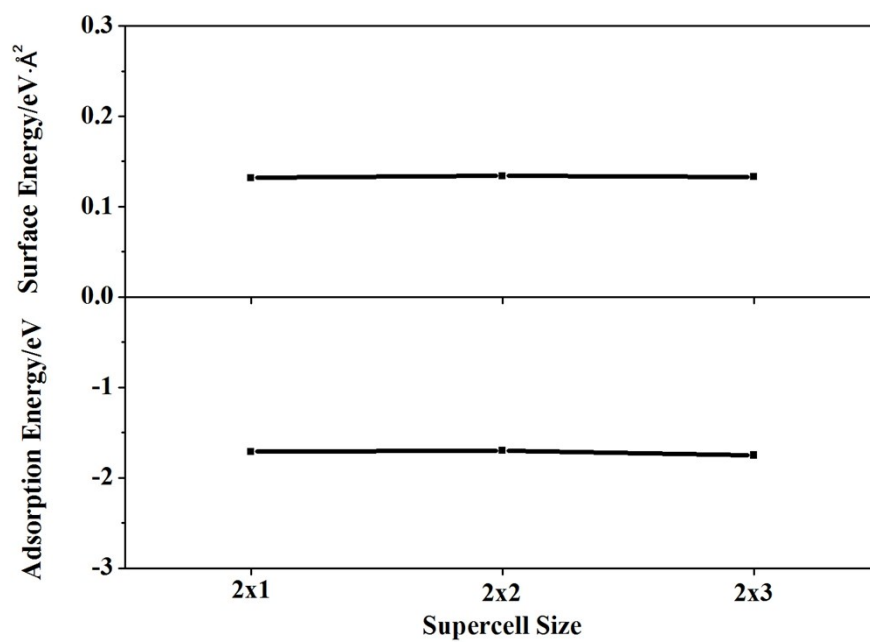

**Fig. S2** Convergence tests of Surface energies and H<sub>2</sub>S adsorption energies for the perfect surface, respectively.

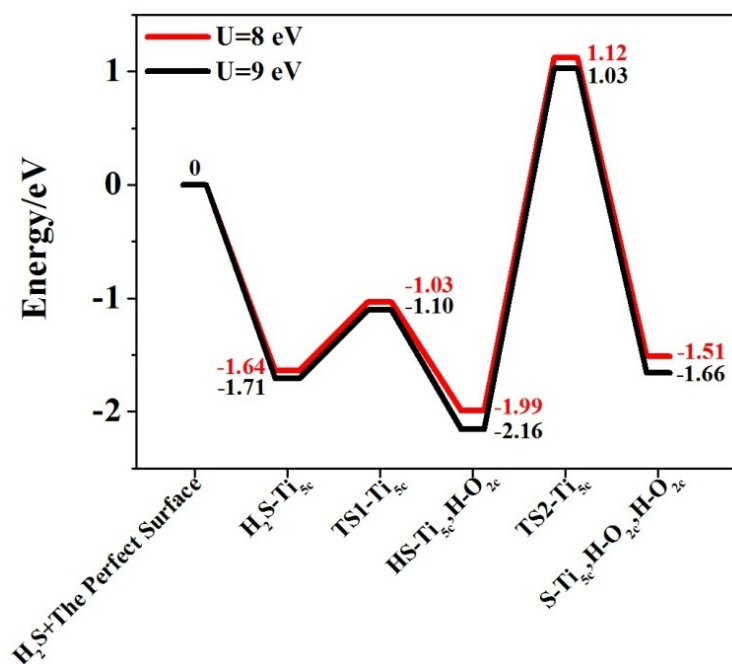

**Fig. S3** Energy profiles for the dissociation of H<sub>2</sub>S on the perfect surface calculated by different U parameters.

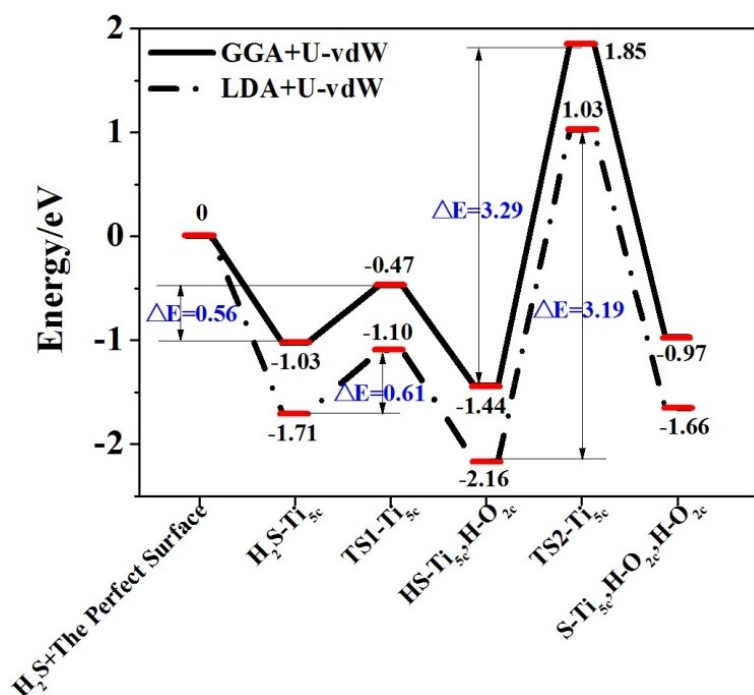

**Fig. S4** Energy profiles for the H<sub>2</sub>S dissociation on the perfect surface from dispersion corrected GGA+U and LDA+U, respectively.

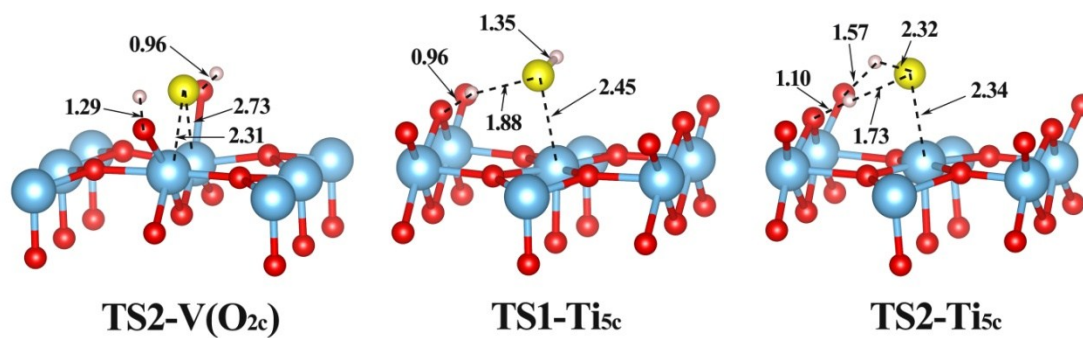

**Fig. S5** Configurations of transition states. The bond length is in Å.

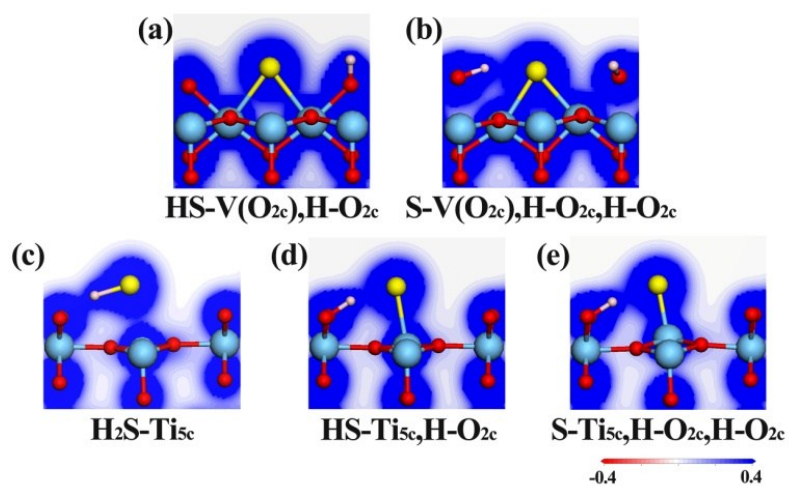

**Fig. S6** The total electron densities of HS/H (a) and S/H/H (b) on the defected surface, and H<sub>2</sub>S (c), HS/H (d) and S/H/H (e) on the perfect surface, respectively. The electron density is in electrons/Å<sup>3</sup>.
